# Supplementary material for: Ferrocene based organometallic gelators: a supramolecular synthon approach
Source: Royal Society of Chemistry journal article supplement (doi:10.1039/c0sm01148g), 2011-01-01
Supplement: c0sm01148g.pdf [file c0sm01148g.pdf]

## SUPPORTING INFORMATION

### Ferrocene Based Organometallic Gelators: A Supramolecular Synthron Approach

Pathik Sahoo,<sup>a</sup> Vedavati G. Puranik,<sup>b</sup> A. K. Partra,<sup>c</sup> P. U. Sastry<sup>c</sup> and Parthasarathi Dastidar<sup>\*,a</sup>

<sup>a</sup>Department of Organic Chemistry, Indian Association for the Cultivation of Science (IACS), 2A & 2B Raja S. C. Mullick Road, Jadavpur, Kolkata – 700032, West Bengal, India.

<sup>b</sup>Center for Materials Characterization, National Chemical Laboratory, Dr. Homi Bhabha Road, Pune - 400 008, India

<sup>c</sup>Solid State Physics Division, B.A.R.C., Trombay, Mumbai 400085, India

E-mail: [parthod123@rediffmail.com](mailto:parthod123@rediffmail.com) ; [ocpd@iacs.res.in](mailto:ocpd@iacs.res.in)

#### Physico-chemical data for the salts

- 1. Butylammoniumferrocenedicarboxylate 1<sub>3</sub>:** m.p. 198-200<sup>0</sup>C. Anal. Calc. for C<sub>20</sub>H<sub>32</sub>FeN<sub>2</sub>O<sub>4</sub>: C, 57.15; H, 7.67; N, 6.66. Found: C, 56.74; H, 7.37; N, 6.29. FT-IR (KBr): 3387, 2960, 2929, 2874, 2796, 2681, 2598, 2571, 2212, 1641, 1525, 1460, 1384, 1348, 1329, 1298, 1184, 1074, 1031, 1020, 931, 914, 848, 825, 810, 775, 744, 594, 559, 499, 484, 410 cm<sup>-1</sup>. <sup>1</sup>H NMR(CD<sub>3</sub>OD) (300MHz) δ = 4.67 (4H, s, Ferrocene Proton), 4.25 (4H, s, Ferrocene Proton), 2.92 (4H, t, J = 7.42 Hz, <sup>+</sup>NH<sub>3</sub>CH<sub>2</sub>CH<sub>2</sub>(CH<sub>2</sub>)<sub>1</sub>CH<sub>3</sub>), 1.67-1.60 (4H, m, <sup>+</sup>NH<sub>3</sub>CH<sub>2</sub>CH<sub>2</sub>(CH<sub>2</sub>)<sub>1</sub>CH<sub>3</sub>), 1.46-1.39 (4H, m, <sup>+</sup>NH<sub>3</sub>CH<sub>2</sub>CH<sub>2</sub>(CH<sub>2</sub>)<sub>1</sub>CH<sub>3</sub>), 0.97 (6H, t, J = 7.23Hz, <sup>+</sup>NH<sub>3</sub>CH<sub>2</sub>CH<sub>2</sub>(CH<sub>2</sub>)<sub>1</sub>CH<sub>3</sub>).
- 2. Pentylammoniumferrocenedicarboxylate 1<sub>4</sub>:** m.p. 190<sup>0</sup>C. Anal. Calc. for C<sub>22</sub>H<sub>36</sub>FeN<sub>2</sub>O<sub>4</sub>: C, 58.93; H, 8.09; N, 6.25. Found\* C, 57.25; H, 7.84; N, 5.84. FT-IR (KBr): 3421, 3022, 2956, 2931, 2870, 2137, 1647, 1575, 1473, 1386, 1357, 1344, 1209, 1182, 1051, 1022, 821, 788.91, 561, 513, 482 cm<sup>-1</sup>. <sup>1</sup>H NMR(CD<sub>3</sub>OD) (500MHz) δ = 4.68 (4H, s, Ferrocene Proton), 4.25 (4H, s, Ferrocene Proton), 2.91 (4H, t, J = 7.5Hz, <sup>+</sup>NH<sub>3</sub>CH<sub>2</sub>CH<sub>2</sub>(CH<sub>2</sub>)<sub>2</sub>CH<sub>3</sub>), 1.68-1.65 (4H, m, <sup>+</sup>NH<sub>3</sub>CH<sub>2</sub>CH<sub>2</sub>(CH<sub>2</sub>)<sub>2</sub>CH<sub>3</sub>), 1.39-1.36 (8H, m, <sup>+</sup>NH<sub>3</sub>CH<sub>2</sub>CH<sub>2</sub>(CH<sub>2</sub>)<sub>2</sub>CH<sub>3</sub>), 0.94 (6H, t, J = 6.75, <sup>+</sup>NH<sub>3</sub>CH<sub>2</sub>CH<sub>2</sub>(CH<sub>2</sub>)<sub>2</sub>CH<sub>3</sub>).  
*\*this is the best results obtained among the several samples tested for elemental analysis.*
- 3. Hexylammoniumferrocenedicarboxylate 1<sub>5</sub>:** m.p. 164-167<sup>0</sup>C. Anal. Calc. for C<sub>24</sub>H<sub>40</sub>FeN<sub>2</sub>O<sub>4</sub>: C, 60.50; H, 8.46; N, 5.88. Found: C, 60.67; H, 8.40; N, 5.30. FT-IR (KBr): 3385, 3090, 3005, 2951, 2931, 2856, 2202, 1633, 1548, 1518, 1473, 1458, 1386, 1338, 1184, 1101, 821, 790, 667, 513 cm<sup>-1</sup>. <sup>1</sup>H NMR(CD<sub>3</sub>OD) (300MHz) δ = 4.67 (4H, s, Ferrocene Proton), 4.25 (4H, s, Ferrocene Proton), 2.91 (4H, t, J = 7.29 Hz, <sup>+</sup>NH<sub>3</sub>CH<sub>2</sub>CH<sub>2</sub>(CH<sub>2</sub>)<sub>3</sub>CH<sub>3</sub>), 1.66-1.64 (4H, m, <sup>+</sup>NH<sub>3</sub>CH<sub>2</sub>CH<sub>2</sub>(CH<sub>2</sub>)<sub>3</sub>CH<sub>3</sub>), 1.35 (12H, m, <sup>+</sup>NH<sub>3</sub>CH<sub>2</sub>CH<sub>2</sub>(CH<sub>2</sub>)<sub>3</sub>CH<sub>3</sub>), 0.90 (6H, br S, <sup>+</sup>NH<sub>3</sub>CH<sub>2</sub>CH<sub>2</sub>(CH<sub>2</sub>)<sub>3</sub>CH<sub>3</sub>).
- 4. Heptylammoniumferrocenedicarboxylate 1<sub>6</sub>:** m.p. 155<sup>0</sup>C. Anal. Calc. for C<sub>26</sub>H<sub>44</sub>FeN<sub>2</sub>O<sub>4</sub>: C, 61.90; H, 8.79; N, 5.55. Found: C, 61.50; H, 8.18; N, 5.13. FT-

- IR (KBr): 3111, 2960, 2928, 2854, 2783, 2686, 2600, 2551, 2212, 1647, 1626, 1518, 1460, 1383, 1338, 1184, 1024, 823, 808, 785, 553, 501, 412  $\text{cm}^{-1}$ .  $^1\text{H}$  NMR( $\text{CD}_3\text{OD}$ ) (300MHz)  $\delta$  = 4.67 (4H, s, Ferrocene Proton), 4.25 (4H, s, Ferrocene Proton), 2.91 (4H, t,  $J$  = 7.44Hz,  $^+\text{NH}_3\text{CH}_2\text{CH}_2(\text{CH}_2)_4\text{CH}_3$ ), 1.66-1.64 (4H, m,  $^+\text{NH}_3\text{CH}_2\text{CH}_2(\text{CH}_2)_4\text{CH}_3$ ), 1.36-1.32 (16H, m,  $^+\text{NH}_3\text{CH}_2\text{CH}_2(\text{CH}_2)_4\text{CH}_3$ ), 0.89 (6H, br s,  $^+\text{NH}_3\text{CH}_2\text{CH}_2(\text{CH}_2)_4\text{CH}_3$ ).
5. **Nonaylammoniumferrocenedicarboxylate 1<sub>8</sub>**: m.p. 137<sup>0</sup>C. Anal. Calc. for  $\text{C}_{30}\text{H}_{52}\text{FeN}_2\text{O}_4$ : C, 64.28; H, 9.35; N, 5.00. Found: C, 64.26; H, 8.45; N, 4.68. FT-IR (KBr): 3111, 2958, 2922, 2852, 2783, 2683, 2573, 2220, 1647, 1626, 1519, 1460, 1383, 1338, 1184, 1024, 823, 808, 785, 555, 501, 418  $\text{cm}^{-1}$ .  $^1\text{H}$  NMR ( $\text{CD}_3\text{OD}$ ) (300MHz)  $\delta$  = 4.67 (4H, s, Ferrocene Proton), 4.25 (4H, s, Ferrocene Proton), 2.91 (4H, t,  $J$  = 7.32Hz,  $^+\text{NH}_3\text{CH}_2\text{CH}_2(\text{CH}_2)_6\text{CH}_3$ ), 1.66 (4H, br s,  $^+\text{NH}_3\text{CH}_2\text{CH}_2(\text{CH}_2)_6\text{CH}_3$ ), 1.35-1.29 (24H, br s,  $^+\text{NH}_3\text{CH}_2\text{CH}_2(\text{CH}_2)_6\text{CH}_3$ ), 0.88 (6H, m,  $^+\text{NH}_3\text{CH}_2\text{CH}_2(\text{CH}_2)_6\text{CH}_3$ ).
6. **Decylammoniumferrocenedicarboxylate 1<sub>9</sub>**: m.p. 138-140<sup>0</sup>C. Anal. Calc. for  $\text{C}_{32}\text{H}_{56}\text{FeN}_2\text{O}_4$ : C, 65.29; H, 9.59; N, 4.76. Found: C, 65.28; H, 9.80; N, 5.17. FT-IR (KBr): 3109, 3091, 2947, 2916, 2852, 2794, 2681, 2578, 2224, 1653, 1629, 1518, 1460, 1384, 1338, 1184, 1120, 1024, 908, 823, 806, 785, 719, 555, 501, 435, 418  $\text{cm}^{-1}$ .  $^1\text{H}$  NMR( $\text{CD}_3\text{OD}$ ) (300MHz)  $\delta$  = 4.67 (4H, d,  $J$  = 1.8Hz, Ferrocene Proton), 4.25 (4H, d,  $J$  = 1.8Hz, Ferrocene Proton), 2.90 (4H, t,  $J$  = 7.32Hz,  $^+\text{NH}_3\text{CH}_2\text{CH}_2(\text{CH}_2)_7\text{CH}_3$ ), 1.65 (4H, br s,  $^+\text{NH}_3\text{CH}_2\text{CH}_2(\text{CH}_2)_7\text{CH}_3$ ), 1.29 (28H, br s,  $^+\text{NH}_3\text{CH}_2\text{CH}_2(\text{CH}_2)_7\text{CH}_3$ ), 0.88 (6H, m,  $^+\text{NH}_3\text{CH}_2\text{CH}_2(\text{CH}_2)_7\text{CH}_3$ ).
7. **Undecylammoniumferrocenedicarboxylate 1<sub>10</sub>**: m.p. 136-138<sup>0</sup>C. Anal. Calc. for  $\text{C}_{34}\text{H}_{60}\text{FeN}_2\text{O}_4$ : C, 66.22; H, 9.81; N, 4.54. Found: C, 65.62; H, 9.09; N, 4.39. FT-IR (KBr): 3111, 3091, 2958, 2918, 2852, 2787, 2681, 2578, 2218, 1651, 1626, 1564, 1516, 1460, 1383, 1338, 1184, 1024, 954, 908, 823, 808, 785, 719, 553, 501, 414  $\text{cm}^{-1}$ .  $^1\text{H}$  NMR( $\text{CD}_3\text{OD}$ ) (500MHz)  $\delta$  = 4.66(4H, s, Ferrocene Proton), 4.24 (4H, s, Ferrocene Proton), 2.90 (4H, t,  $J$  = 7.50Hz,  $^+\text{NH}_3\text{CH}_2\text{CH}_2(\text{CH}_2)_8\text{CH}_3$ ), 1.65-1.64 (4H, m,  $^+\text{NH}_3\text{CH}_2\text{CH}_2(\text{CH}_2)_8\text{CH}_3$ ), 1.35-1.28 (32H, m,  $^+\text{NH}_3\text{CH}_2\text{CH}_2(\text{CH}_2)_8\text{CH}_3$ ), 0.88 (6H, t,  $J$  = 6.5,  $^+\text{NH}_3\text{CH}_2\text{CH}_2(\text{CH}_2)_8\text{CH}_3$ ).
8. **Dodecylammoniumferrocenedicarboxylate 1<sub>11</sub>**: m.p. 142-146<sup>0</sup>C. Anal. Calc. for  $\text{C}_{36}\text{H}_{64}\text{FeN}_2\text{O}_4$ : C, 67.06; H, 10.01; N, 4.34. Found: C, 67.31; H, 9.80; N, 4.26. FT-IR (KBr): 3109, 3091, 2916, 2852, 2789, 2685, 2565, 2225, 1629, 1519, 1460, 1384, 1338, 1184, 1122, 1033, 806, 785, 555, 501, 418  $\text{cm}^{-1}$ .  $^1\text{H}$  NMR( $\text{CD}_3\text{OD}$ ) (300MHz)  $\delta$  = 4.68(4H, s, Ferrocene Proton), 4.25 (4H, s, Ferrocene Proton), 2.90 (4H, t,  $J$  = 7.5Hz,  $^+\text{NH}_3\text{CH}_2\text{CH}_2(\text{CH}_2)_9\text{CH}_3$ ), 1.65-1.63 (4H, m,  $^+\text{NH}_3\text{CH}_2\text{CH}_2(\text{CH}_2)_9\text{CH}_3$ ), 1.35-1.28 (36H, m,  $^+\text{NH}_3\text{CH}_2\text{CH}_2(\text{CH}_2)_9\text{CH}_3$ ), 0.89(6H, t,  $J$  = 6.16,  $^+\text{NH}_3\text{CH}_2\text{CH}_2(\text{CH}_2)_9\text{CH}_3$ ).
9. **Tridecylammoniumferrocenedicarboxylate 1<sub>12</sub>**: m.p. 138-141<sup>0</sup>C. Anal. Calc. for  $\text{C}_{38}\text{H}_{68}\text{FeN}_2\text{O}_4$ : C, 67.84; H, 10.19; N, 4.16. Found: C, 67.35; H, 9.81; N, 4.28. FT-IR (KBr): 3111, 3091, 2958, 2918, 2852, 2787, 2677, 2576, 2218, 1647, 1627, 1519, 1460, 1383, 1338, 1184, 1024, 825, 808, 785, 553, 501, 418  $\text{cm}^{-1}$ .  $^1\text{H}$  NMR( $\text{CD}_3\text{OD}$ ) (500MHz)  $\delta$  = 4.68(4H, s, Ferrocene Proton), 4.25 (4H, s, Ferrocene Proton), 2.89(4H, t,  $J$  = 7.5Hz,  $^+\text{NH}_3\text{CH}_2\text{CH}_2(\text{CH}_2)_{10}\text{CH}_3$ ), 1.66-1.62 (4H, m,  $^+\text{NH}_3\text{CH}_2\text{CH}_2(\text{CH}_2)_{10}\text{CH}_3$ ), 1.36-1.28 (40H, m,  $^+\text{NH}_3\text{CH}_2\text{CH}_2(\text{CH}_2)_{10}\text{CH}_3$ ), 0.89(6H, t,  $J$  = 6.5,  $^+\text{NH}_3\text{CH}_2\text{CH}_2(\text{CH}_2)_{10}\text{CH}_3$ ).

- 10. Tetradecylammoniumferrocenedicarboxylate 1<sub>13</sub>:** m.p. 134-138<sup>0</sup>C. Anal. Calc. for C<sub>40</sub>H<sub>72</sub>FeN<sub>2</sub>O<sub>4</sub>: C, 68.55; H, 10.35; N, 4.00. Found: C, 68.74; H, 10.73; N, 3.98. FT-IR (KBr): 3109, 3093, 3080, 2916, 2852, 2796, 2677, 2573, 2225, 1633, 1516, 1460, 1384, 1338, 1184, 1124, 1026, 956, 823, 806, 783, 717, 555, 501, 482, 418 cm<sup>-1</sup>. <sup>1</sup>H NMR(CD<sub>3</sub>OD) (500MHz) δ = 4.68(4H, s, Ferrocene Proton), 4.25 (4H, s, Ferrocene Proton), 2.89(4H, t, J = 7.50Hz, <sup>+</sup>NH<sub>3</sub>CH<sub>2</sub>CH<sub>2</sub>(CH<sub>2</sub>)<sub>11</sub>CH<sub>3</sub>), 1.65-1.61 (4H, m, <sup>+</sup>NH<sub>3</sub>CH<sub>2</sub>CH<sub>2</sub>(CH<sub>2</sub>)<sub>11</sub>CH<sub>3</sub>), 1.36-1.28 (44H, m, <sup>+</sup>NH<sub>3</sub>CH<sub>2</sub>CH<sub>2</sub>(CH<sub>2</sub>)<sub>11</sub>CH<sub>3</sub>), 0.89(6H, t, J = 6.75, <sup>+</sup>NH<sub>3</sub>CH<sub>2</sub>CH<sub>2</sub>(CH<sub>2</sub>)<sub>11</sub>CH<sub>3</sub>).
- 11. Pentadecylammoniumferrocenedicarboxylate 1<sub>14</sub>:** m.p. 131<sup>0</sup>C. Anal. Calc. for C<sub>42</sub>H<sub>76</sub>FeN<sub>2</sub>O<sub>4</sub>: C, 69.21; H, 10.51; N, 3.84. Found: C, 69.16; H, 10.23; N, 3.82. FT-IR (KBr): 3111, 3090, 3078, 2958, 2916, 2852, 2787, 2677, 2584, 2214, 1629, 1519, 1458, 1384, 1336, 1199, 1182, 1028, 806, 783, 553, 501 cm<sup>-1</sup>. <sup>1</sup>H NMR(CD<sub>3</sub>OD) (500MHz) δ = 4.67(4H, s, Ferrocene Proton), 4.24 (4H, s, Ferrocene Proton), 2.89(4H, t, J = 7.5Hz, <sup>+</sup>NH<sub>3</sub>CH<sub>2</sub>CH<sub>2</sub>(CH<sub>2</sub>)<sub>12</sub>CH<sub>3</sub>), 1.68-1.62 (4H, m, <sup>+</sup>NH<sub>3</sub>CH<sub>2</sub>CH<sub>2</sub>(CH<sub>2</sub>)<sub>12</sub>CH<sub>3</sub>), 1.37-1.27 (48H, m, <sup>+</sup>NH<sub>3</sub>CH<sub>2</sub>CH<sub>2</sub>(CH<sub>2</sub>)<sub>12</sub>CH<sub>3</sub>), 0.89(6H, t, J = 6.75, <sup>+</sup>NH<sub>3</sub>CH<sub>2</sub>CH<sub>2</sub>(CH<sub>2</sub>)<sub>12</sub>CH<sub>3</sub>).
- 12. Hexadecylammoniumferrocenedicarboxylate 1<sub>15</sub>:** m.p 131<sup>0</sup>C. Anal. Calc. for C<sub>44</sub>H<sub>80</sub>FeN<sub>2</sub>O<sub>4</sub>: C, 69.81; H, 10.65; N, 3.70. Found: C, 69.61; H, 10.53; N, 3.81. FT-IR (KBr): 3109, 3091, 3080, 2916, 2852, 2796, 2681, 2573, 2225, 1631, 1519, 1460, 1384, 1338, 1184, 1030, 806, 783, 717, 555, 501, 489, 416 cm<sup>-1</sup>. <sup>1</sup>H NMR(CD<sub>3</sub>OD) (300MHz) δ = 4.68(4H, s, Ferrocene Proton), 4.25 (4H, s, Ferrocene Proton), 2.90(4H, t, J = 7.45Hz, <sup>+</sup>NH<sub>3</sub>CH<sub>2</sub>CH<sub>2</sub>(CH<sub>2</sub>)<sub>13</sub>CH<sub>3</sub>), 1.65 (4H, m, <sup>+</sup>NH<sub>3</sub>CH<sub>2</sub>CH<sub>2</sub>(CH<sub>2</sub>)<sub>13</sub>CH<sub>3</sub>), 1.35-1.28 (52H, m, <sup>+</sup>NH<sub>3</sub>CH<sub>2</sub>CH<sub>2</sub>(CH<sub>2</sub>)<sub>13</sub>CH<sub>3</sub>), 0.89(6H, t, J = 5.95, <sup>+</sup>NH<sub>3</sub>CH<sub>2</sub>CH<sub>2</sub>(CH<sub>2</sub>)<sub>13</sub>CH<sub>3</sub>).

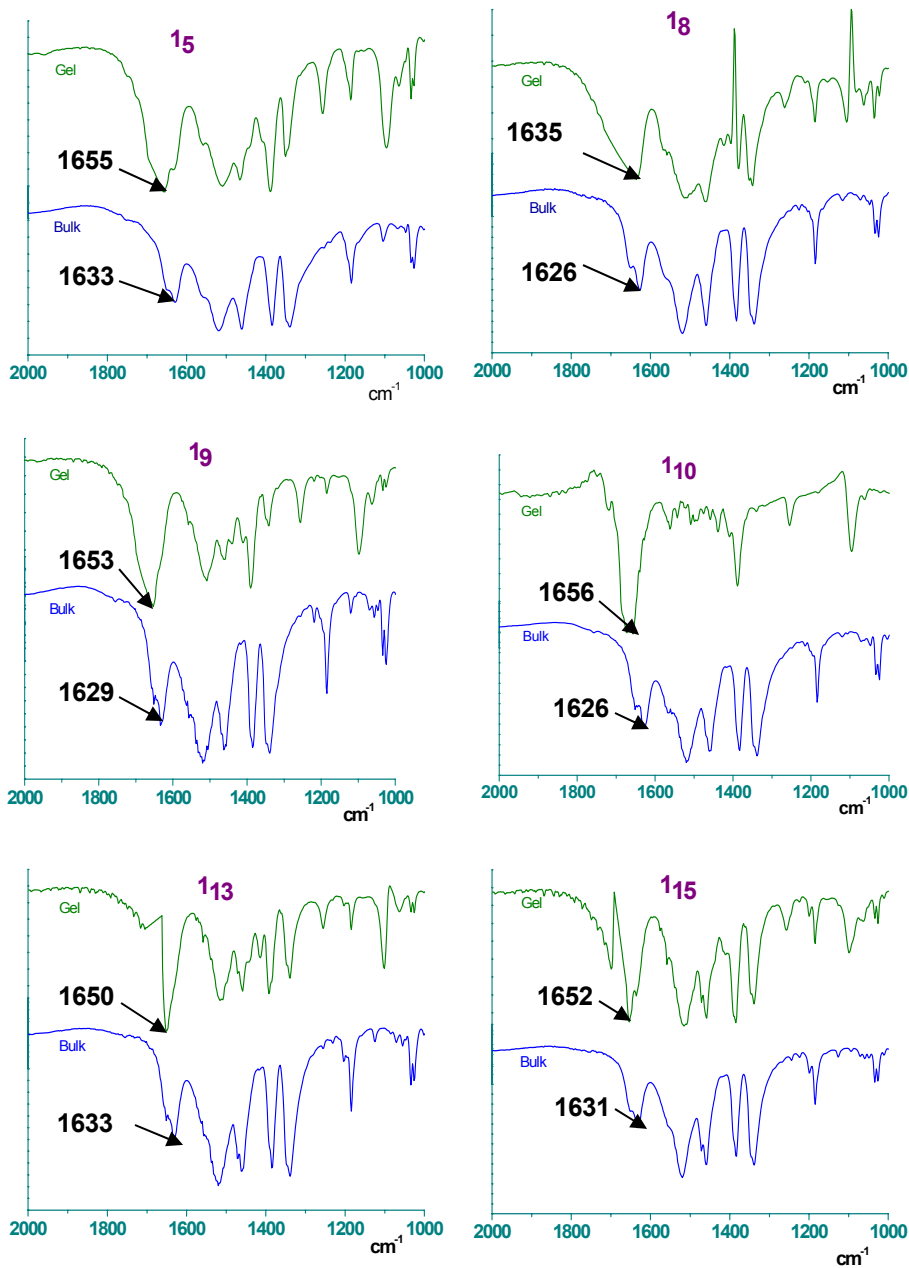

**FT-IR of 5 wt % DMF gels (olive) and the corresponding salt as synthesized (blue)**

### X-ray single crystal data.

Data were collected using MoK $\alpha$  ( $\lambda = 0.7107 \text{ \AA}$ ) radiation on a BRUKER APEX II diffractometer equipped with CCD area detector. Data collection, data reduction, structure solution/refinement were carried out using the software package of SMART APEX. All structures were solved by direct method and refined in a routine manner. In most of the cases, nonhydrogen atoms were treated anisotropically. All the hydrogen atoms were geometrically fixed. CCDC (CCDC No. 795748-795753) contains the supplementary crystallographic data for this paper. These data can be obtained free of charge via [www.ccdc.cam.ac.uk/conts/retrieving.html](http://www.ccdc.cam.ac.uk/conts/retrieving.html) (or from the Cambridge Crystallographic Data Centre, 12 Union Road, Cambridge CB21EZ, UK; fax: (+44) 1223-336-033; or [deposit@ccdc.cam.ac.uk](mailto:deposit@ccdc.cam.ac.uk)).

### Molecular Plots and Hydrogen Bonding Parameters for the compounds

#### Compound: **1<sub>5</sub>**

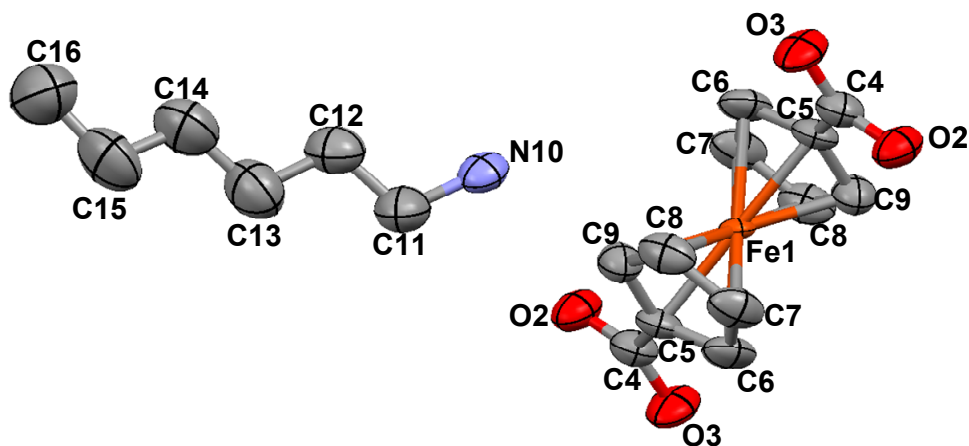

#### Hydrogen bonding parameters

| <i>D—H...A</i>                                                                                                                               | <i>D—H</i> | <i>H...A</i> | <i>D...A</i> | <i>D—H...A</i> |
|----------------------------------------------------------------------------------------------------------------------------------------------|------------|--------------|--------------|----------------|
| <b>1<sub>5</sub></b>                                                                                                                         |            |              |              |                |
| N10—H10A...O3 <sup>i</sup>                                                                                                                   | 0.89       | 1.82         | 2.700 (8)    | 168.3          |
| N10—H10B...O2 <sup>ii</sup>                                                                                                                  | 0.89       | 1.92         | 2.770 (8)    | 160.0          |
| N10—H10C...O2 <sup>iii</sup>                                                                                                                 | 0.89       | 1.87         | 2.727 (8)    | 160.0          |
| Symmetry codes: (i) <i>x</i> +1, <i>y</i> , <i>z</i> ; (ii) <i>-x</i> +1, <i>-y</i> +1, <i>-z</i> +2; (iii) <i>x</i> , <i>y</i> , <i>z</i> . |            |              |              |                |

**Compound: 1<sub>9</sub>**

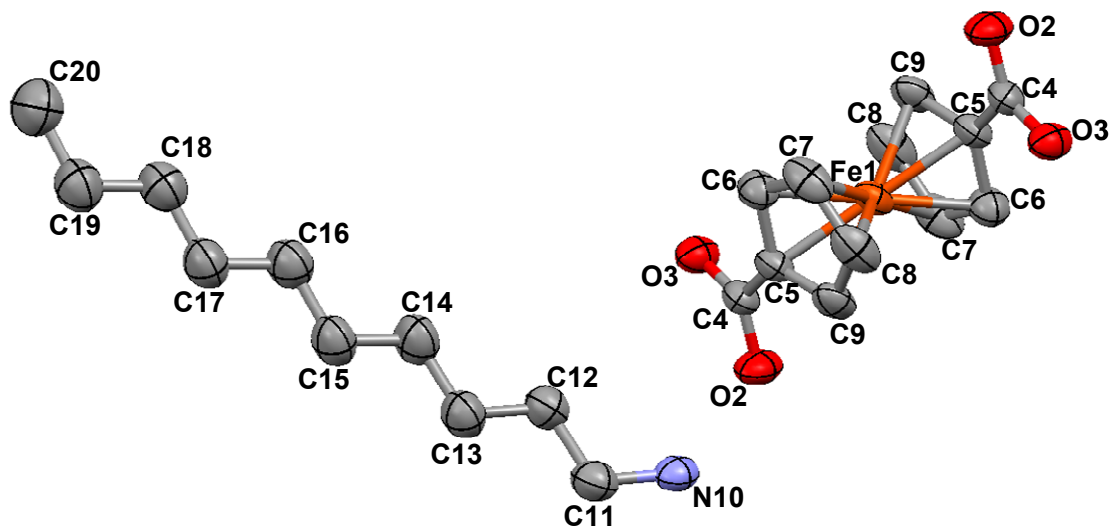

**Hydrogen bonding parameters**

| <b>1<sub>9</sub></b>                                                          |      |      |           |       |
|-------------------------------------------------------------------------------|------|------|-----------|-------|
| N10—H10A···O3 <sup>i</sup>                                                    | 0.89 | 1.90 | 2.770 (3) | 164.2 |
| N10—H10B···O3 <sup>ii</sup>                                                   | 0.89 | 1.87 | 2.724 (3) | 159.6 |
| N10—H10C···O2 <sup>iii</sup>                                                  | 0.89 | 1.82 | 2.694 (3) | 166.9 |
| Symmetry codes: (i) $-x+1, -y+1, -z+1$ ; (ii) $x+1, y, z$ ; (iii) $x, y, z$ . |      |      |           |       |

**Compound: 1<sub>11</sub>**

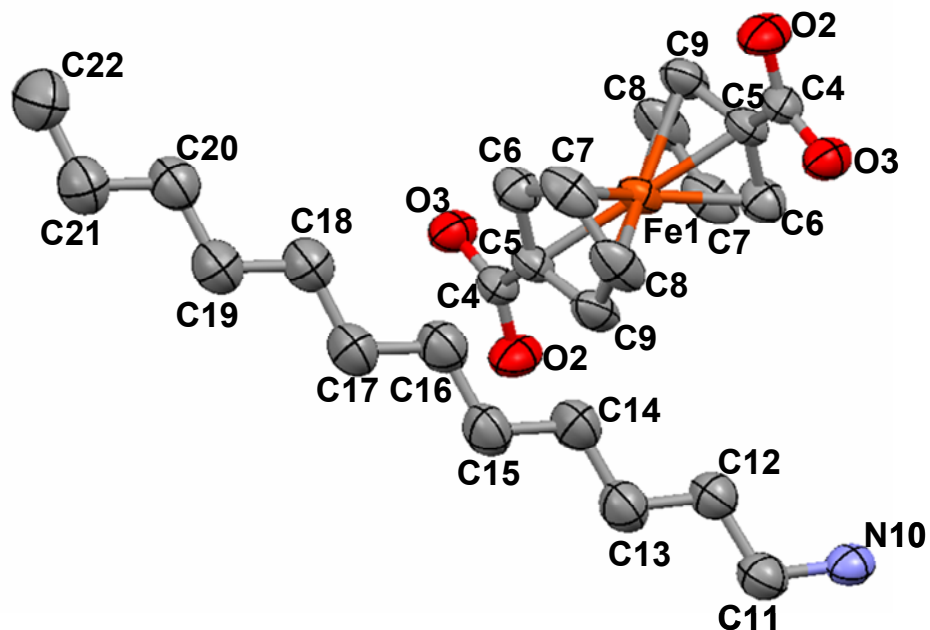

**Hydrogen bonding parameters**

| <b>1<sub>11</sub></b>                                               |      |      |           |       |
|---------------------------------------------------------------------|------|------|-----------|-------|
| N10—H10A···O3 <sup>i</sup>                                          | 0.89 | 1.91 | 2.775 (3) | 164.6 |
| N10—H10B···O3 <sup>ii</sup>                                         | 0.89 | 1.87 | 2.724 (3) | 159.5 |
| N10—H10C···O2 <sup>iii</sup>                                        | 0.89 | 1.82 | 2.697(3)  | 166.6 |
| Symmetry codes: (i) -x, -y+1, -z; (ii) x-1, y-1, z; (iii) x, y-1, z |      |      |           |       |

**Compound: 1<sub>12</sub>**

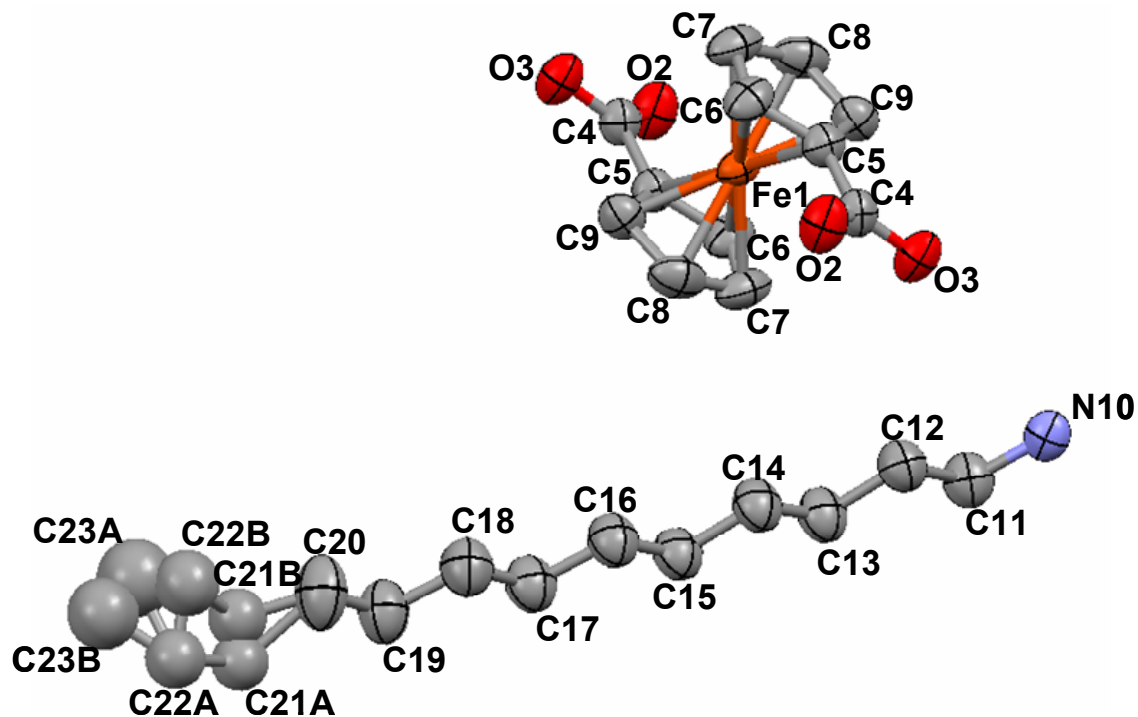

**Hydrogen bonding parameters**

| <b>1<sub>12</sub></b>                                                 |      |      |           |       |
|-----------------------------------------------------------------------|------|------|-----------|-------|
| N10—H10A···O3 <sup>i</sup>                                            | 0.89 | 1.91 | 2.778 (3) | 162.8 |
| N10—H10B···O3 <sup>ii</sup>                                           | 0.89 | 1.88 | 2.731 (3) | 160.5 |
| N10—H10C···O2 <sup>iii</sup>                                          | 0.89 | 1.85 | 2.722 (3) | 167.9 |
| Symmetry codes: (i) -x+1, -y+1, -z; (ii) x-1, y-1, z; (iii) x, y-1, z |      |      |           |       |



**Compound: 1<sub>13</sub>**

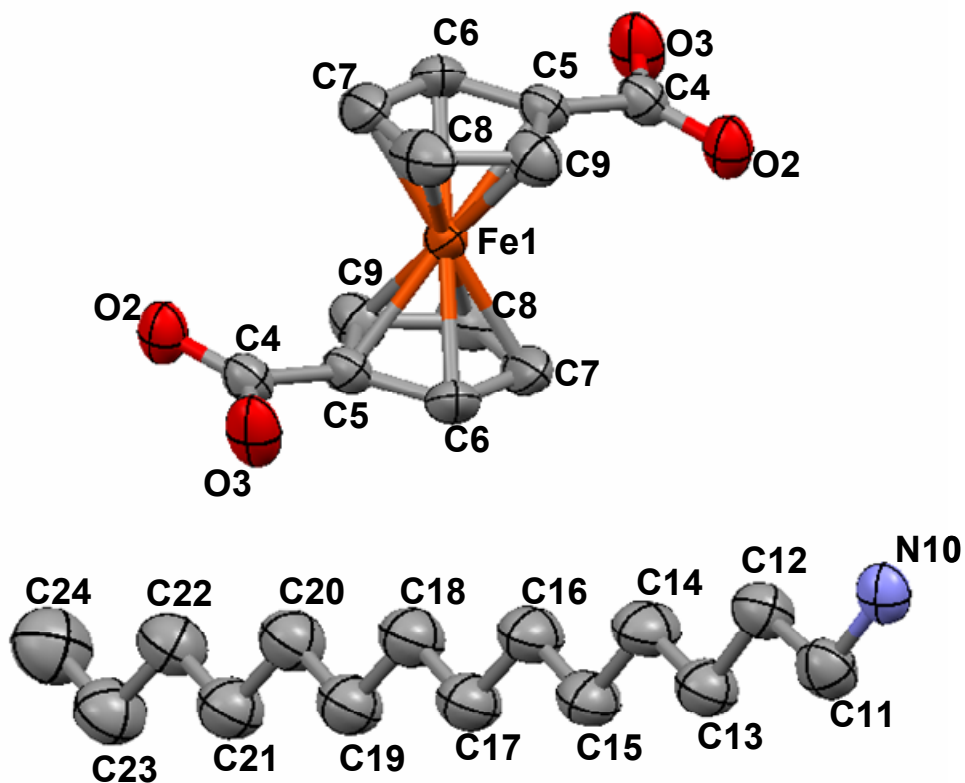

**Hydrogen bonding parameters**

| <b>1<sub>13</sub></b>                                                |      |      |           |       |
|----------------------------------------------------------------------|------|------|-----------|-------|
| N10—H10C···O2 <sup>i</sup>                                           | 0.89 | 1.92 | 2.779 (3) | 162.8 |
| N10—H10B···O2 <sup>ii</sup>                                          | 0.89 | 1.87 | 2.729 (3) | 160.7 |
| N10—H10A···O3 <sup>iii</sup>                                         | 0.89 | 1.82 | 2.697 (3) | 169.5 |
| Symmetry codes: (i) -x+1, -y, -z; (ii) x+1, y-1, z; (iii) x, y-1, z. |      |      |           |       |

Compound: 1<sub>14</sub>

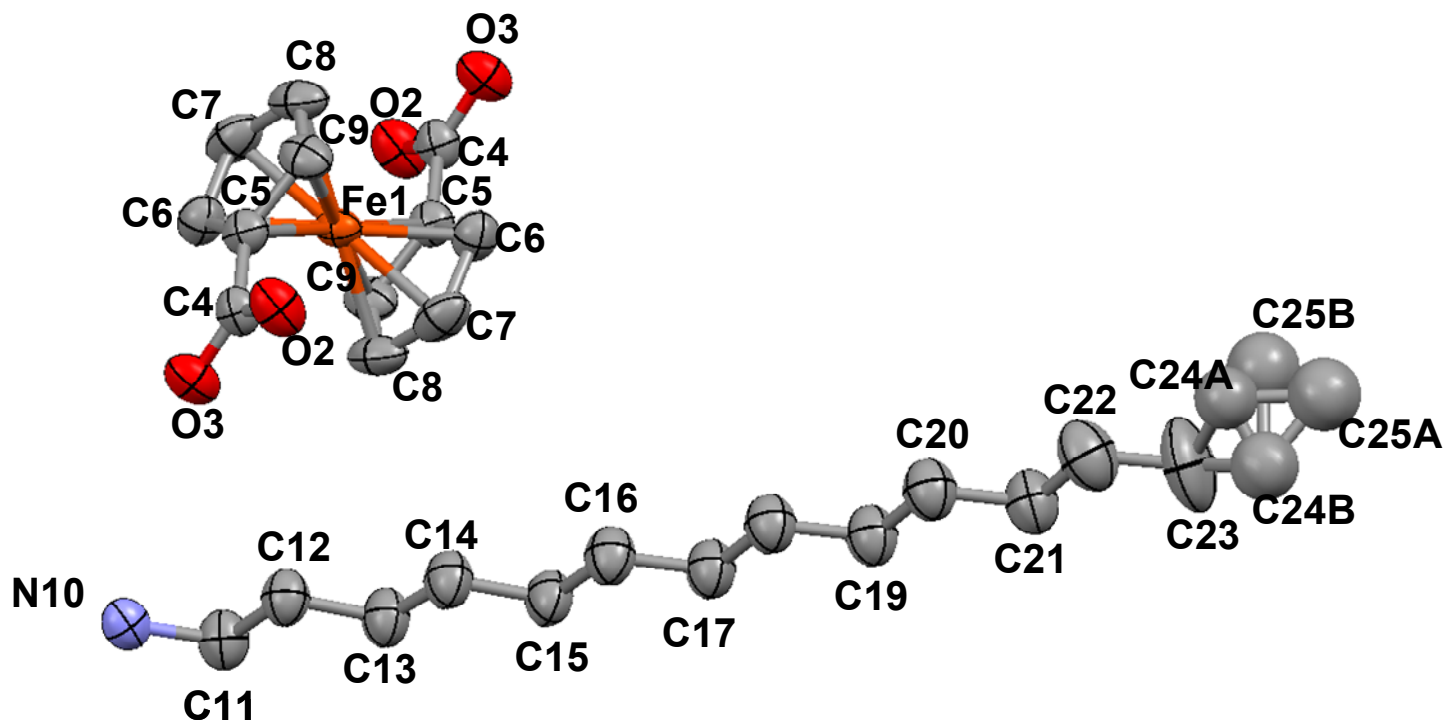

Hydrogen bonding parameters

| F.2A <sub>14</sub>                                                                 |      |      |           |       |
|------------------------------------------------------------------------------------|------|------|-----------|-------|
| N10—H10A···O3 <sup>i</sup>                                                         | 0.89 | 1.92 | 2.777 (3) | 161.3 |
| N10—H10B···O2 <sup>ii</sup>                                                        | 0.89 | 1.84 | 2.725 (3) | 170.2 |
| N10—H10C···O3 <sup>iii</sup>                                                       | 0.89 | 1.88 | 2.737 (3) | 161.3 |
| Symmetry codes: (i) $x+1, y, z$ ; (ii) $-x+1, -y, -z+1$ ; (iii) $-x+2, -y, -z+1$ . |      |      |           |       |
